# Supplementary material for: Identification and Expression Profiling of TGA Transcription Factor Genes in Sugarcane Reveals the Roles in Response to Sporisorium scitamineum Infection
Source: MDPI journal article supplement (doi:10.3390/agriculture12101644), 2022-10-08
Supplement: s1 [file s1]

---

### Supplementary Table

| Gene    | Forward primer (5'→3') | Reverse primer (5'→3') |
|---------|------------------------|------------------------|
| ShTGA1  | AGCTCTCGGATACACAGGGT   | CAGAGGAAGAACCTCTCGGC   |
| ShTGA2  | AGCACCACATGAACGACCTC   | TCTCGTCGTAGTGCAGCATC   |
| ShTGA3  | TCCTGACAATCCGACAAGCC   | GGCCTAGCAAGCCAAAGAGA   |
| ShTGA4  | TGTTGCTGCAAAGGCTGATG   | TCAGATGGACGAAAACCCCC   |
| ShTGA5  | TCAGGCATGTGGAAGACACC   | AAGGATTGCTGAAGGGCCTC   |
| ShTGA7  | TGGGAAAACCTTGGCACCCCTT | GCAAGTAGAGCTCGTGCTGA   |
| ShTGA8  | TAAGCTCCCTCTGGGCTTCT   | CTTTGGGATGGTTGTGCTGC   |
| ShTGA9  | AGCGATGCTTCCTCTGGATG   | CCTTCGAGGTGGACAGCTT    |
| ShTGA10 | AGGCCGACAATCTAAGGCAG   | CTCGGTCCCGATGAAGTTGT   |
| ShTGA11 | CTCGGTGCTTCCTCTCCATC   | GGGAACTGGCTTTGGTGCTA   |
| ShTGA12 | GAACTGCACACTGCAAGAGC   | CTTGATGCCCACCATCTCGT   |
| ShTGA13 | GCAAGAACTCATCAGGGTGC   | ACCGCTCGTACTCCAGGT     |
| ShTGA14 | AAGACACTGAGGAGGCTTGC   | ACATCAGCTTGCTGTGCTCT   |
| ShTGA15 | CTTCATTGCGGTTGTCTGGC   | TCCATCTGCAGGAGCCAAAG   |
| ShTGA16 | ACTGAGGCAGAACTCGGTG    | CCCAGGGGAAATGAATGCCT   |
| GAPDH   | CACGCCACTGAGCA         | TCCAGTTCCATGCC         |

Supplementary Table S1 The specific nucleotide sequences of primers for qRT-PCR

| Query    | Top Scoring Sequences                                  | Sequences Logo | Width |
|----------|--------------------------------------------------------|----------------|-------|
| motif 1  | IVDGIMAHYDELFRKGVAAKADVHL<br>LSGMWKTPAERCFLWLGGFRPSE   |                | 50    |
| motif 2  | SSRJKLAQLEQELQRRARQQGIFIGGSGD                          |                | 28    |
| motif 3  | FLRQADNLRQQLHQMHRILTTRQAA<br>RALLAISDYFSRLRALSSLWLARP  |                | 50    |
| motif 4  | QLEPLTEQQLVGICNLQQSSQQAEEALS<br>QGMEALQQSLADT          |                | 41    |
| motif 5  | FDMEYARWLEEHNKQMAELRAALNA<br>HLSGDGLR                  |                | 33    |
| motif 6  | NVANYMGQMALAMGKLTLEN                                   |                | 21    |
| motif 7  | PPPTLNIFPSWPMRSLQTPK                                   |                | 20    |
| motif 8  | MADASPRTDTSTDLDTDKNQ                                   |                | 21    |
| motif 9  | VIVSVLADPREAGDGDGEGRIPPKPLSRI<br>FVVVLJDGVKYVTYSCVLPFK |                | 50    |
| motif 10 | DQKTLRRLAQNREAARKSRLRKKAYV<br>QQLE                     |                | 30    |

Supplementary Table S2 The characteristics of conserved motifs in ShTGAs using MEME-suite.

| Gene 1  | Gene 2  | Ks          | Ka          | Ka/Ks       | Mya         |
|---------|---------|-------------|-------------|-------------|-------------|
| ShTGA1  | ShTGA14 | 1.603801041 | 0.700894485 | 0.437020844 | 53.46003471 |
| ShTGA1  | ShTGA12 | 0.907429507 | 0.661915765 | 0.729440425 | 30.24765022 |
| ShTGA1  | ShTGA15 | 2.365839097 | 1.398357474 | 0.591061951 | 78.86130324 |
| ShTGA1  | ShTGA10 | 0.997511923 | 0.64335157  | 0.644956271 | 33.25039744 |
| ShTGA1  | ShTGA8  | 1.877433286 | 0.562785731 | 0.299763371 | 62.58110955 |
| ShTGA1  | ShTGA16 | 2.107938481 | 1.49997283  | 0.71158283  | 70.26461603 |
| ShTGA1  | ShTGA11 | 1.485951274 | 0.668252021 | 0.44971328  | 49.53170913 |
| ShTGA1  | ShTGA13 | 1.284834469 | 0.755194357 | 0.587775605 | 42.82781563 |
| ShTGA2  | ShTGA15 | 2.091926335 | 1.544157664 | 0.738151071 | 69.73087783 |
| ShTGA2  | ShTGA16 | 3.158179388 | 1.519290527 | 0.481065304 | 105.2726463 |
| ShTGA9  | ShTGA14 | 2.199340915 | 0.585372471 | 0.266158133 | 73.31136382 |
| ShTGA9  | ShTGA12 | 1.84781963  | 0.569800165 | 0.30836352  | 61.59398767 |
| ShTGA9  | ShTGA10 | 1.387408902 | 0.466748599 | 0.336417475 | 46.24696339 |
| ShTGA9  | ShTGA11 | 2.405669465 | 0.516216074 | 0.214583126 | 80.18898216 |
| ShTGA9  | ShTGA13 | 2.432109298 | 0.608494398 | 0.250192045 | 81.07030994 |
| ShTGA10 | ShTGA14 | 1.568689162 | 0.609918033 | 0.38880745  | 52.28963872 |
| ShTGA10 | ShTGA12 | 0.757336748 | 0.669435055 | 0.883933147 | 25.24455826 |
| ShTGA10 | ShTGA11 | 1.195858029 | 0.377644741 | 0.315793959 | 39.86193429 |
| ShTGA10 | ShTGA13 | 1.162790397 | 0.734253718 | 0.63145836  | 38.7596799  |
| ShTGA11 | ShTGA14 | 1.973285332 | 0.590074058 | 0.29903129  | 65.77617773 |
| ShTGA11 | ShTGA12 | 1.963295672 | 0.691831778 | 0.352382877 | 65.44318907 |
| ShTGA11 | ShTGA13 | 1.813124015 | 0.728181137 | 0.40161684  | 60.43746716 |
| ShTGA12 | ShTGA14 | 1.197073522 | 0.454927416 | 0.380032978 | 39.90245073 |
| ShTGA12 | ShTGA13 | 0.955799348 | 0.603285108 | 0.631183845 | 31.85997827 |
| ShTGA13 | ShTGA14 | 1.600188613 | 0.541421089 | 0.338348295 | 53.33962043 |
| ShTGA13 | ShTGA15 | 2.762734502 | 1.498406139 | 0.542363422 | 92.09115008 |
| ShTGA13 | ShTGA16 | 2.029334395 | 1.472166693 | 0.725443129 | 67.64447983 |
| ShTGA14 | ShTGA15 | 2.977113303 | 1.318489129 | 0.442875025 | 99.23711009 |

Supplementary Table S3 The substitution rate ratio Ka/Ks and divergence time between the *TGA* gene family members
